# Supplementary material for: Evaluation of the 2023 Duke-International Society of Cardiovascular Infectious Diseases Criteria in a Multicenter Cohort of Patients With Suspected Infective Endocarditis
Source: PubMed Central journal article supplement (PMC11006096; doi:10.1093/cid/ciae039), 2024-02-08

**Supplementary Table 1** Characteristics of patients without final infective endocarditis diagnosis

|                                   | <b>No infective<br/>endocarditis (n=1031)</b> |      |
|-----------------------------------|-----------------------------------------------|------|
| <b>Final diagnosis</b>            |                                               |      |
| Other type of infection, n (%)    | 855                                           | (83) |
| Stroke, n (%)                     | 25                                            | (2)  |
| Malignancy-related fever, n (%)   | 21                                            | (2)  |
| Fever of unknown origin, n (%)    | 36                                            | (4)  |
| Autoimmune disease, n (%)         | 23                                            | (2)  |
| Non-infective endocarditis, n (%) | 12                                            | (1)  |
| Other diagnoses, n (%)            | 59                                            | (6)  |

**Supplementary Table 2.** Misclassification of non-infective endocarditis cases as definite infective endocarditis by clinical criteria (by any version of Duke criteria)

|    | <b>Microbiologic criterion (positive bcs)</b> | <b>Imaging criterion</b>                           | <b>Predisposition</b>         | <b>Fever</b> | <b>Vascular phenomena</b>   | <b>Immunologic phenomena</b> | <b>Valve surgery</b> | <b>Pathological exclusion criterion</b> | <b>Final diagnosis</b>                                   |
|----|-----------------------------------------------|----------------------------------------------------|-------------------------------|--------------|-----------------------------|------------------------------|----------------------|-----------------------------------------|----------------------------------------------------------|
| 1  | Bacteremia <i>S. aureus</i> (2 bcs)           | Significant new valvular regurgitation             |                               | Y            |                             |                              | N                    | N                                       | Catheter-related bacteremia                              |
| 2  | Bacteremia <i>S. mitis</i> (2 bcs)            | Significant new valvular regurgitation             | Moderate valve stenosis       | Y            |                             |                              | Y                    | Y                                       | Oral abscess                                             |
| 3  | Bacteremia <i>C. hominis</i> (1 bcs)          | Significant new valvular regurgitation             | Prosthetic valve, prior IE    | Y            |                             |                              | N                    | N                                       | Auto-immune diseases (translocation)                     |
| 4  | Bacteremia <i>S. anginosus</i> (2 bcs)        |                                                    | Prosthetic valve              | Y            | Pulmonary septic emboli     | Roth's spot                  | N                    | N                                       | Catheter-related bacteremia with septic thrombophlebitis |
| 5  |                                               | Vegetation, significant new valvular regurgitation | Prosthetic valve              | Y            | Cerebral emboli             |                              | Y                    | Y                                       | Marantic IE                                              |
| 6  | Bacteremia <i>S. aureus</i> (2 bcs)           |                                                    | IV drug use, prosthetic valve | Y            | Peripheral mycotic aneurysm |                              | N                    | N                                       | Contiguous mycotic aneurysm (IV drug use)                |
| 7  |                                               | Significant new valvular regurgitation             | Prosthetic valve              | Y            | Cerebral emboli             |                              | Y                    | Y                                       | Marantic IE                                              |
| 8  |                                               | Significant new valvular regurgitation             |                               | Y            | Cerebral emboli             | Positive rheumatoid factor   | N                    | N                                       | Pneumonia                                                |
| 9  | Bacteremia <i>S. pneumoniae</i> (2 bcs)       | Significant new valvular regurgitation             | Bicuspid aortic valve         | Y            | Cerebral emboli             |                              | N                    | N                                       | Pneumonia                                                |
| 10 | <i>B. henselae</i> IgG titer $\geq 1:800$     | Significant new valvular regurgitation             |                               | N            |                             |                              | N                    | N                                       | Paradoxal reaction to tuberculosis treatment             |

|    |                                                    |                                                                           |                                    |   |                         |             |   |   |                                                               |
|----|----------------------------------------------------|---------------------------------------------------------------------------|------------------------------------|---|-------------------------|-------------|---|---|---------------------------------------------------------------|
| 11 | Bacteremia (nosocomial) <i>E. faecalis</i> (2 bcs) | Abnormal metabolic activity ( <sup>18</sup> F-FDG PET/CT) of native valve |                                    | N |                         |             | N | N | Catheter-related bacteremia                                   |
| 12 | Bacteremia <i>S. epidermidis</i> (2 bcs)           |                                                                           | Moderate valve regurgitation, CIED | N | Pulmonary septic emboli |             | N | N | Catheter-related bacteremia with septic thrombophlebitis      |
| 13 | Bacteremia <i>L. garvieae</i> (3 bcs)              |                                                                           | Prosthetic valve                   | Y | Cerebral emboli         |             | N | N | Spondylodiscitis (cerebral emboli due to atrial fibrillation) |
| 14 | Bacteremia <i>S. epidermidis</i> (3 bcs)           |                                                                           | Prior IE                           | Y |                         | Roth's spot | N | N | Catheter-related bacteremia with septic thrombophlebitis      |
| 15 | Bacteremia <i>S. aureus</i> (2 bcs)                |                                                                           | IV drug use                        | Y | Pulmonary septic emboli |             | N | N | Cellulitis with septic thrombophlebitis                       |
| 16 | Bacteremia <i>S. aureus</i> (2 bcs)                |                                                                           | CIED                               | Y | Pulmonary septic emboli |             | N | N | Catheter-related bacteremia with septic thrombophlebitis      |
| 17 | Candidemia <i>C. tropicalis</i> (3 bcs)            |                                                                           |                                    | Y | Ocular emboli           | Roth's spot | N | N | Catheter-related urinary tract infection                      |

<sup>18</sup>F-FDG PET/CT: <sup>18</sup>F-Fluorodeoxyglucose Positron Emission Tomography/Computed Tomography; bcs: blood culture set; CIED: cardiac implantable electronic device; IE: infective endocarditis; N: no; Y: yes

**Supplementary table 3.** Misclassification of infective endocarditis cases as rejected by clinical criteria (by any version of Duke criteria)

|    | <b>Microbiologic criterion (positive bcs)</b>         | <b>Imaging criterion</b>                                                  | <b>Predisposition</b>             | <b>Fever</b> | <b>Vascular phenomena</b> | <b>Immunologic phenomena</b> | <b>Valve surgery</b> | <b>Surgical criterion</b> | <b>Pathological criterion</b> | <b>Other information</b>   |
|----|-------------------------------------------------------|---------------------------------------------------------------------------|-----------------------------------|--------------|---------------------------|------------------------------|----------------------|---------------------------|-------------------------------|----------------------------|
| 1  | Bacteremia <i>S. epidermidis</i> (2 bcs)              | Abnormal metabolic activity ( <sup>18</sup> F-FDG PET/CT) of native valve | Prior IE ( <i>S.epidermidis</i> ) | N            |                           |                              | N                    | N                         | N                             |                            |
| 2  | On antibiotic treatment                               | CIED-lead lesion (degenerative)                                           | CIED                              | N            |                           |                              | N                    | N                         | N                             | Positive CIED-lead culture |
| 3  | On antibiotic treatment                               | CIED-lead lesion (degenerative)                                           | CIED                              | N            |                           |                              | N                    | N                         | N                             | Positive CIED-lead culture |
| 4  | On antibiotic treatment                               | CIED-lead lesion (degenerative)                                           | CIED                              | N            |                           |                              | N                    | N                         | N                             | Positive CIED-lead culture |
| 5  | On antibiotic treatment                               | CIED-lead lesion (degenerative)                                           | CIED                              | N            |                           |                              | N                    | N                         | N                             | Positive CIED-lead culture |
| 6  | Bacteremia <i>S. epidermidis</i> (2 bcs)              | Abnormal metabolic activity ( <sup>18</sup> F-FDG PET/CT) of CIED cable   | CIED                              | Y            |                           |                              | N                    | N                         | N                             | Positive CIED-lead culture |
| 7  | Bacteremia <i>S. agalactiae</i> (2 bcs)               | Abnormal metabolic activity ( <sup>18</sup> F-FDG PET/CT) of native valve |                                   | Y            |                           |                              | N                    | N                         | N                             |                            |
| 8  | Bacteremia <i>B. pumilus</i> (2 bcs)                  | Abnormal metabolic activity ( <sup>18</sup> F-FDG PET/CT) of TAVI         | TAVI                              | Y            |                           |                              | N                    | N                         | N                             |                            |
| 9  | Bacteremia (persistent) <i>S. epidermidis</i> (2 bcs) |                                                                           | TAVI                              | Y            |                           |                              | N                    | N                         | N                             |                            |
| 10 | Bacteremia (persistent) <i>S. epidermidis</i> (2 bcs) |                                                                           | TAVI                              | Y            |                           |                              | N                    | N                         | N                             |                            |

|    |                                                       |                                                                                                                |                                                            |   |   |   |   |                            |
|----|-------------------------------------------------------|----------------------------------------------------------------------------------------------------------------|------------------------------------------------------------|---|---|---|---|----------------------------|
| 11 | bcs)<br>Bacteremia <i>S. agalactiae</i> (2 bcs)       | Small mobile element (degenerative)                                                                            | TAVI                                                       | Y | N | N | N |                            |
| 12 | Bacteremia (persistent) <i>S. epidermidis</i> (2 bcs) |                                                                                                                | Prosthetic valve, CIED, prior IE ( <i>S. epidermidis</i> ) | Y | Y | Y | Y | Positive CIED-lead culture |
| 13 | Bacteremia <i>S. dysgalactiae</i> (2 bcs)             | Small mobile element (degenerative)                                                                            |                                                            | Y | N | N | N |                            |
| 14 | Bacteremia <i>S. agalactiae</i> (3 bcs)               | Significant new valvular regurgitation                                                                         |                                                            | Y | N | N | N |                            |
| 15 | On antibiotic treatment                               |                                                                                                                | Bicuspid aortic valve                                      | N | Y | Y | Y |                            |
| 16 | Bacteremia <i>C. fetus</i> (2 bcs)                    | Small mobile element (degenerative), abnormal metabolic activity ( <sup>18</sup> F-FDG PET/CT) of native valve |                                                            | N | N | N | N |                            |
| 17 | On antibiotic treatment                               | CIED-cable lesion (degenerative)                                                                               | Prosthetic valve, CIED                                     | N | N | N | N | Positive CIED-lead culture |
| 18 | On antibiotic treatment                               | CIED-lead vegetation                                                                                           | CIED                                                       | N | N | N | N |                            |
| 19 | On antibiotic treatment                               | CIED-lead vegetation, valve vegetation                                                                         | CIED                                                       | N | N | N | N | Positive CIED-lead culture |
| 20 | Bacteremia <i>S. aureus</i> (2 bcs)                   |                                                                                                                | CIED                                                       | N | N | N | N | Positive CIED-lead culture |
| 21 | Bacteremia <i>S. epidermidis</i> (2 bcs)              | CIED-lead vegetation                                                                                           | CIED                                                       | N | N | N | N | Positive CIED-lead culture |

|    |                                                            |                                                                                               |                         |   |   |   |   |                            |
|----|------------------------------------------------------------|-----------------------------------------------------------------------------------------------|-------------------------|---|---|---|---|----------------------------|
| 22 | Bacteremia (community-acquired) <i>E. faecium</i> (1 bcs)  | CIED-lead vegetation, abnormal metabolic activity ( <sup>18</sup> F-FDG PET/CT) of CIED cable | CIED                    | N | N | N | N | Positive CIED-lead culture |
| 23 | On antibiotic treatment                                    | Significant new valvular regurgitation                                                        |                         | Y | Y | Y | Y |                            |
| 24 | On antibiotic treatment                                    | CIED-lead vegetation                                                                          | CIED                    | N | N | N | N | Positive CIED-lead culture |
| 25 | On antibiotic treatment                                    | Valve vegetation                                                                              | Prior IE                | N | N | N | N |                            |
| 26 | Bacteremia (community-acquired) <i>E. faecalis</i> (2 bcs) | Significant new valvular regurgitation                                                        | Severe valve stenosis   | N | N | N | N |                            |
| 27 | Bacteremia <i>S. lugdunensis</i> (2 bcs)                   | Abnormal metabolic activity ( <sup>18</sup> F-FDG PET/CT) of prosthetic valve                 | Prosthetic valve        | Y | Y | Y | N |                            |
| 28 | Candidemia <i>C. glabrata</i> (3 bcs)                      | Abnormal metabolic activity ( <sup>18</sup> F-FDG PET/CT) of prosthetic valve                 | Prosthetic valve        | Y | N | N | N |                            |
| 29 | <i>B. henselae</i> IgG titer ≥1:800                        | Abnormal metabolic activity ( <sup>18</sup> F-FDG PET/CT) of prosthetic valve                 | Prosthetic valve        | Y | N | N | N |                            |
| 30 | Bacteremia <i>P. aeruginosa</i> (2 bcs)                    | Thickening valve leaflet, abnormal metabolic activity ( <sup>18</sup> F-FDG                   | Moderate valve stenosis | Y | N | N | N |                            |

|    |                                                       |                                                                                                                                       |                            |   |                                           |   |   |   |
|----|-------------------------------------------------------|---------------------------------------------------------------------------------------------------------------------------------------|----------------------------|---|-------------------------------------------|---|---|---|
| 31 | On antibiotic treatment                               | PET/CT) of native valve<br>Abnormal metabolic activity ( <sup>18</sup> F-FDG PET/CT) of prosthetic valve                              | Prosthetic valve           | Y |                                           | N | N | N |
| 32 | On antibiotic treatment                               | Small mobile element (degenerative), abnormal metabolic activity ( <sup>18</sup> F-FDG PET/CT) of native valve, abscess on cardiac CT |                            | Y | Arterial emboli, cerebral emboli          | N | N | N |
| 33 | On antibiotic treatment                               |                                                                                                                                       | Prosthetic valve           | N |                                           | Y | Y | N |
| 34 | Bacteremia (persistent) <i>S. epidermidis</i> (2 bcs) | Small mobile element (degenerative)                                                                                                   | Prosthetic valve           | Y |                                           | N | N | N |
| 35 | Bacteremia (nosocomial) <i>E. faecalis</i> (2 bcs)    | Thickening valve leaflet                                                                                                              | TAVI, CIED                 | Y |                                           | N | N | N |
| 36 | Bacteremia <i>S. enteritidis</i> (2 bcs)              | Abnormal metabolic activity ( <sup>18</sup> F-FDG PET/CT) of native valve                                                             |                            | Y | Pulmonary septic emboli                   | N | N | N |
| 37 | On antibiotic treatment                               |                                                                                                                                       | Prior IE                   | Y | Cerebral emboli                           | N | N | N |
| 38 | Bacteremia <i>S. epidermidis</i> (2 bcs)              |                                                                                                                                       | Severe valve regurgitation | Y | Pulmonary septic emboli, mycotic aneurysm | N | N | N |

|    |                                                            |                                     |                            |   |                  |   |   |   |                           |
|----|------------------------------------------------------------|-------------------------------------|----------------------------|---|------------------|---|---|---|---------------------------|
| 39 | Bacteremia <i>S. pneumoniae</i> (2 bcs)                    | CIED-lead lesion (degenerative)     | CIED                       | Y |                  | N | N | N | Multiple septic arthritis |
| 40 | On antibiotic treatment                                    | Thickening valve leaflet            |                            | Y |                  | N | N | N | Multiple septic arthritis |
| 41 | Bacteremia <i>S. epidermidis</i> (2 bcs)                   | Thickening valve leaflet            |                            | N | Cerebral emboli  | N | N | N |                           |
| 42 | Bacteremia <i>S. agalactiae</i> (2 bcs)                    |                                     | Bicuspid aortic valve      | Y |                  | Y | Y | Y |                           |
| 43 | Bacteremia (community-acquired) <i>E. faecalis</i> (2 bcs) | Small mobile element (degenerative) | Prosthetic valve           | Y |                  | N | N | N |                           |
| 44 | On antibiotic treatment                                    | Thickening valve leaflet            |                            | Y | Mycotic aneurysm | N | N | N | Septic arthritis          |
| 45 | Bacteremia <i>S. aureus</i> (1 bcs)                        | Thickening valve leaflet            |                            | Y |                  | N | N | N |                           |
| 46 | Bacteremia (community-acquired) <i>E. faecalis</i> (1 bcs) | Thickening valve leaflet            |                            | N |                  | N | N | N | Septic arthritis          |
| 47 | Bacteremia <i>A. defectiva</i> (2 bcs)                     | Thickening valve leaflet            | Prolapsus of mitral valve  | Y |                  | Y | Y | Y |                           |
| 48 | Bacteremia <i>S. mitis</i> (2 bcs)                         | Thickening valve leaflet            | Severe valve regurgitation | N |                  | N | N | N |                           |
| 49 | On antibiotics                                             | Small mobile element (degenerative) | Prosthetic valve, CIED     | N |                  | N | N | N |                           |
| 50 | Bacteremia <i>S. epidermidis</i> (3 bcs)                   | Small mobile element (degenerative) |                            | N |                  | N | N | N |                           |



|    |                                                           |                                                                               |                            |   |                         |   |   |   |
|----|-----------------------------------------------------------|-------------------------------------------------------------------------------|----------------------------|---|-------------------------|---|---|---|
| 51 | Bacteremia <i>A. defectiva</i> (2 bcs)                    | Valve vegetation                                                              |                            | Y |                         | N | N | N |
| 52 | On antibiotics                                            | Abnormal metabolic activity ( <sup>18</sup> F-FDG PET/CT) of CIED-lead        | CIED                       | N |                         | N | N | N |
| 53 | Bacteremia <i>P. aeruginosa</i> (2 bcs)                   | Abnormal metabolic activity ( <sup>18</sup> F-FDG PET/CT) of CIED-lead        | CIED                       | Y |                         | N | N | N |
| 54 | Bacteremia <i>S. agalactiae</i> (1 bcs)                   | Small mobile element (degenerative)                                           | Prosthetic valve, CIED     | Y |                         | N | N | N |
| 55 | Bacteremia (community-acquired) <i>E. faecium</i> (3 bcs) | Abnormal metabolic activity ( <sup>18</sup> F-FDG PET/CT) of CIED-lead        | CIED                       | N |                         | N | N | N |
| 56 | Bacteremia <i>S. epidermidis</i> (2 bcs)                  | Small mobile element (degenerative)                                           |                            | Y | Pulmonary septic emboli | N | N | N |
| 57 | On antibiotics                                            | Small mobile element (degenerative)                                           | Severe valve regurgitation | N |                         | Y | Y | Y |
| 58 | Bacteremia <i>S. aureus</i> (2 bcs)                       | Small mobile element (degenerative)                                           | Severe valve regurgitation | N |                         | N | N | N |
| 59 | On antibiotics                                            | Abnormal metabolic activity ( <sup>18</sup> F-FDG PET/CT) of prosthetic valve | Prosthetic valve, CIED     | Y |                         | N | N | N |
| 60 | On antibiotics                                            | Abnormal metabolic activity ( <sup>18</sup> F-FDG                             | Prosthetic valve, CIED     | N |                         | N | N | N |

|    |                                                            |                                                                                                                 |                        |   |                               |   |   |   |
|----|------------------------------------------------------------|-----------------------------------------------------------------------------------------------------------------|------------------------|---|-------------------------------|---|---|---|
| 61 | On antibiotics                                             | PET/CT) of prosthetic valve<br>Abnormal metabolic activity ( <sup>18</sup> F-FDG<br>PET/CT) of prosthetic valve | Prosthetic valve, CIED | N | Cerebral emboli, renal emboli | N | N | N |
| 62 | Bacteremia <i>Gemella spp.</i> (3 bcs)                     | Abnormal metabolic activity ( <sup>18</sup> F-FDG<br>PET/CT) of prosthetic valve                                | Prosthetic valve, CIED | Y |                               | N | N | N |
| 63 | Bacteremia <i>S. aureus</i> (2 bcs)                        | CIED-lead lesion (degenerative)                                                                                 | CIED                   | N |                               | N | N | N |
| 64 | On antibiotics                                             | CIED-lead lesion (degenerative)                                                                                 | Prior IE, CIED         | N |                               | N | N | N |
| 65 | Bacteremia <i>S. aureus</i> (2 bcs)                        | CIED-lead lesion (degenerative)                                                                                 | Prior IE, CIED         | N |                               | N | N | N |
| 66 | On antibiotics                                             | Valve vegetation                                                                                                | Prior IE, CIED         | N |                               | N | N | N |
| 67 | On antibiotics                                             | CIED-lead vegetation                                                                                            | CIED                   | N |                               | N | N | N |
| 68 | On antibiotics                                             | CIED-lead vegetation                                                                                            | Prior IE, CIED         | N |                               | N | N | N |
| 69 | On antibiotics                                             | Valve vegetation                                                                                                |                        | N |                               | N | N | N |
| 70 | On antibiotics                                             | Small mobile element (degenerative)                                                                             | Prosthetic valve, CIED | Y |                               | Y | Y | N |
| 71 | Bacteremia (community-acquired) <i>E. faecalis</i> (3 bcs) | Small mobile element (degenerative)                                                                             | Prior IE, CIED         | Y |                               | N | N | N |
| 72 | Bacteremia <i>S. epidermidis</i> (3 bcs)                   | CIED-lead lesion (degenerative)                                                                                 | CIED                   | Y |                               | N | N | N |

|    |                                          |                           |      |   |   |   |   |
|----|------------------------------------------|---------------------------|------|---|---|---|---|
| 73 | Bacteremia <i>S. lugdunensis</i> (3 bcs) | Valve vegetation, abscess | TAVI | N | Y | Y | N |
| 74 | Bacteremia <i>S. epidermidis</i> (2 bcs) | CIED-lead vegetation      | CIED | N | N | N | N |

<sup>18</sup>F-FDG PET/CT: <sup>18</sup>F-Fluorodeoxyglucose Positron Emission Tomography/Computed Tomography; bcs: blood culture set; CIED: cardiac implantable electronic device; IE: infective endocarditis; N: no; TAVI: Transcatheter aortic valve implantation; Y: yes

**Supplementary Figure 1.** Classifications of episodes by different versions of Duke criteria based on **A)** clinical criteria, **B)** clinical criteria and implementation of the pathological confirmation and rejection criteria and **C)** final infective endocarditis diagnosis.

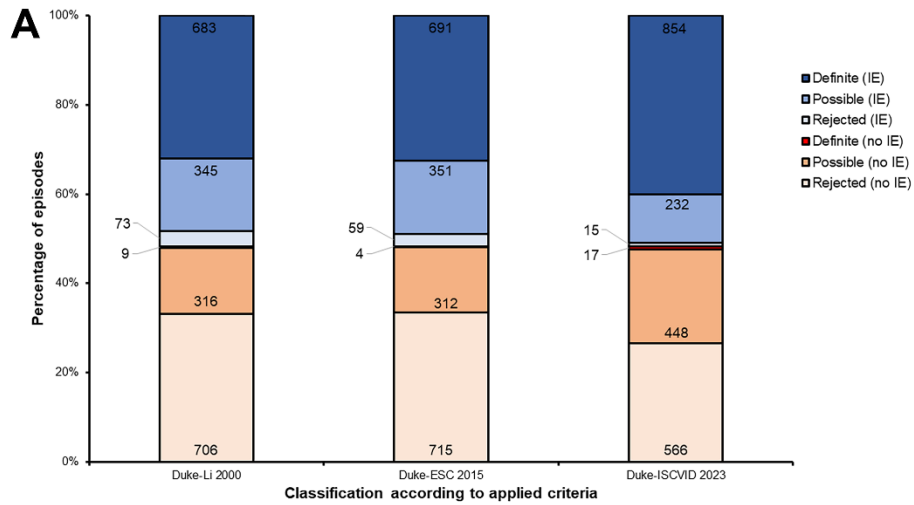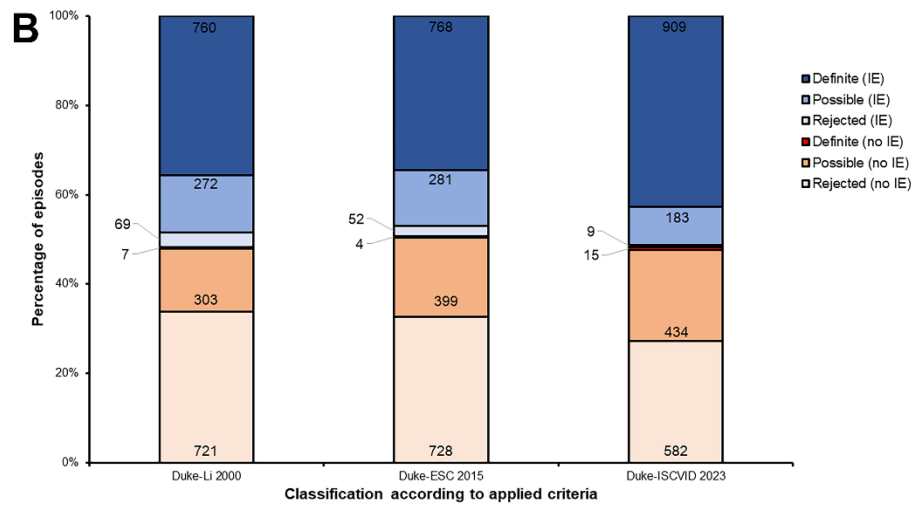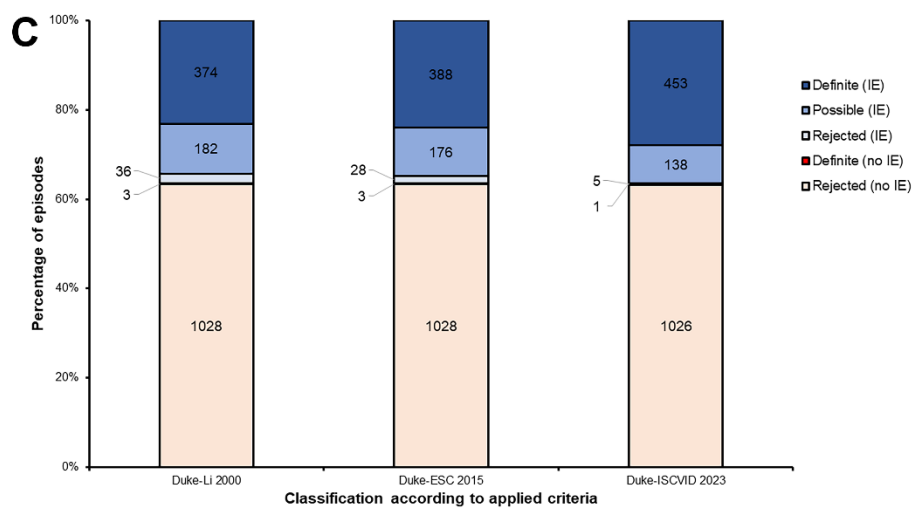

Supplement: ciae039_supplementary_data.pdf [file ciae039_supplementary_data.pdf]
